# Supplementary material
Source: HighWire-hosted journal article supplement (https://erj.ersjournals.com/content/55/2/1902013)
Supplement: inline-supplementary-material-1 [file inline-supplementary-material-1.pdf]

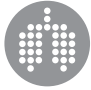

ERJ European Respiratory Journal Eur Respir J 0903-1936/1399-3003 European Respiratory Society 10.1183/13993003.02013-2019 ERJ-02013-2019 AGORA CORRESPONDENCE

Electrical stimulation in obstructive sleep apnoea: the less invasive the better?  
CORRESPONDENCE CORRESPONDENCE Electrical stimulation in OSA

Pengo Martino<sup>1</sup>, Schwarz Esther Irene<sup>2</sup>, Steier Joerg<sup>3</sup>,

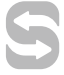

SHAREABLE PDF

<sup>1</sup>Sleep Disorder Centre, IRCCS Istituto Auxologico Italiano, Milan, Italy. <sup>2</sup>Dept of Pulmonology and Sleep Disorders Centre, University of Zurich, Zurich, Switzerland. <sup>3</sup>Centre of Human and Applied Physiology (CHAPS), King's College London, London, UK.

**Correspondence:** Joerg Steier, Guy's and St Thomas' NHS Foundation Trust, Lane Fox Unit/Sleep Disorders Centre, South Wing, Ground Floor, Westminster Bridge Road, London, SE1 7EH, UK. E-mail: joerg.steier@gstt.nhs.uk 2020201955013102019171020192020

*To the Editors:*

We read with interest the article by EASTWOOD *et al.* [1] on bilateral hypoglossal nerve stimulation for treatment of adult obstructive sleep apnoea (OSA), the BLAST OSA trial. The authors present data on a novel approach, the Genio system, to stimulate the hypoglossal nerve and provide neuromuscular tone to the genioglossus, the main dilator muscle of the upper airway, to improve upper airway patency in OSA. The primary outcomes of the BLAST OSA trial focus on indices describing severity of OSA, the apnoea-hypopnoea index (AHI), and the safety of this approach. The AHI improved by 10.8 events per hour at 6 months, leading to a symptomatic improvement, as measured by the Epworth Sleepiness Scale and the Functional Outcome of Sleep Questionnaire (FOSQ-10), and any serious adverse events observed were related to the surgical procedure; most minor adverse events wore off during the 6-month follow-up period.
